# Supplementary material for: Maternal exposure to low-level air pollution and pregnancy outcomes: a population-based study
Source: Springer Nature journal article supplement (doi:10.1186/1476-069x-1-6), 2002-12-09
Supplement: Additional file 1 [file 1476-069x-1-6-s1.doc]

**Table 1. Distribution of potential risk factors for low birth weight and premature births by exposure categories**

|  | Formaldehyde exposure (tertiles) | | | NO2 exposure (tertiles) | | |
| --- | --- | --- | --- | --- | --- | --- |
|  | 1 (reference) | 2 | 3 | 1 (reference) | 2 | 3 |
| Pollutant (g/m3) |  2.00 | 2.01-3.90 | > 3.90 |  5.04 | 5.05-13.84 | > 13.84 |
| Number of singleton live births | 1313 (32.9%) | 1319 (33.1%) | 1356 (34.0%) | 1286 (32.2%) | 1384 (34.7%) | 1318 (33.0%) |
| Mean birth weight (SD) † | 3489.9 (525.9) | 3502.4 (552.6) | 3472.7 (545.8) | 3489.0 (532.1) | 3506.2 (530.7) | 3468.4 (561.6) |
| Mean gestational age (SD) | 39.4 (1.8) | 39.4 (1.9) | 39.3 (1.8) | 39.4 (1.7) | 39.4 (1.8) | 39.3 (1.9) |
| Low birth weight newborns | 38 (2.9%) | 48 (3.6%) | 54 (4.0%) | 41 (3.2%) | 42 (3.0%) | 57 (4.3%) |
| Preterm births | 64 (4.9%) | 63 (4.8%) | 76 (5.6%) | 58 (4.5%) | 63 (4.6%) | 82 (6.2%) |
| Sex of newborn  Male  Female | 703 (53.5%)  610 (46.5%) | 695 (52.7%)  624 (47.3%) | 739 (54.5%)  617 (45.5%) | 684 (53.2%)  602 (46.8%) | 733 (53.0%)  651 (47.0%) | 720 (54.6%)  598 (45.4%) |
| Maternal age   19  20-29  30-34   35 | 54 (4.1%)  821 (62.5%)  296 (22.5%)  142 (10.8%) | 85 (6.4%)*  852 (64.6%)  238 (18.0%)*  144 (10.9%) | 89 (6.6%)*  912 (67.3%)*  227 (16.7%)*  128 (9.4%) | 59 (4.6%)  824 (64.1%)  268 (20.8%)  135 (10.5%) | 93 (6.7%)*  908 (65.6%)  247 (17.8%)*  136 (9.8%) | 76 (5.8%)  853 (64.7%)  246 (18.7%)  143 (10.8%) |
| Maternal education  < 12 years   12 years | 110 (8.4%)  1203 (91.6%) | 112 (8.5%)  1207 (91.5%) | 100 (7.4%)  1256 (92.6%) | 99 (7.7%)  1187 (92.3%) | 102 (7.4%)  1282 (92.6%) | 121 (9.2%)  1197(90.8%) |
| Marital status  Married  Single  Divorced | 1147 (87.4%)  144 (11.0%)  22 (1.7%) | 1136 (86.1%)  172 (13.0%)  11 (0.8%) | 1188 (87.6%)  151 (11.1%)  17 (1.3%) | 1125 (87.5%)  138 (10.7%)  23 (1.8%) | 1195 (86.3%)  172 (12.4%)  17 (1.2%) | 1151 (87.3%)  157 (11.9%)  10 (0.8%)* |
| Previous spontaneous abortions | 141 (10.7%) | 180 (13.6%)* | 162 (11.9%) | 134 (10.4%) | 171 (12.4%) | 178 (13.5%)* |
| Parity  Nulliparous | 604 (46.0%) | 680 (51.6%)* | 738 (54.4%)* | 624 (48.5%) | 714 (51.6%) | 684 (51.6%) |
| Maternal smoking | 52 (4.0%) | 46 (3.5%) | 40 (2.9%) | 48 (3.7%) | 46 (3.3%) | 44 (3.3%) |
| Paternal smoking | 520 (39.6%) | 506 (38.4%) | 483 (35.6%)* | 518 (40.3%) | 509 (36.8%)* | 482 (36.6%)* |
| Season of birth  Spring  Summer  Autumn  Winter | 795 (60.5%)  206 (15.7%)  2 (0.2%)  310 (23.6%) | 101 (7.7%)*  190 (14.4%)  621 (47.1%)*  407 (30.9%)* | 195 (14.4%)*  694 (51.2%)*  303 (22.3%)*  164 (12.1%)* | 644 (50.1%)  301 (23.4%)  25 (1.9%)  316 (24.6%) | 236 (17.1%)*  471 (34.0%)*  370 (26.7%)*  307 (22.2%) | 211 (16.0%)*  318 (24.1%)  531 (40.3%)*  258 (19.6%)* |

* significant difference from reference (p<0.05)

† standard deviation
